# Supplementary material for: Polyamino acid-based gemcitabine nanocarriers for targeted intracellular drug delivery
Source: Royal Society of Chemistry journal article supplement (doi:10.1039/c7py00443e), 2017-01-01
Supplement: c7py00443e1.pdf [file c7py00443e1.pdf]

## Polyamino acid-based gemcitabine nanocarriers for targeted intracellular drug delivery

Wenzhuo Teng<sup>a</sup>, Fan Jia<sup>a</sup>, Haijie Han<sup>a</sup>, Zihui Qin<sup>a</sup>, Qiao Jin<sup>\*a,b</sup>, Jian Ji<sup>a</sup>

<sup>a</sup> MOE Key Laboratory of Macromolecule Synthesis and Functionalization of Ministry of Education, Department of Polymer Science and Engineering, Zhejiang University, Hangzhou, 310027, China.

<sup>b</sup> State Key Laboratory of Molecular Engineering of Polymers, Fudan University, Shanghai, 200433, China.

Fax: (+86)571-87953729; Tel: (+86)571-87953729; E-mail: jinqiao@zju.edu.cn

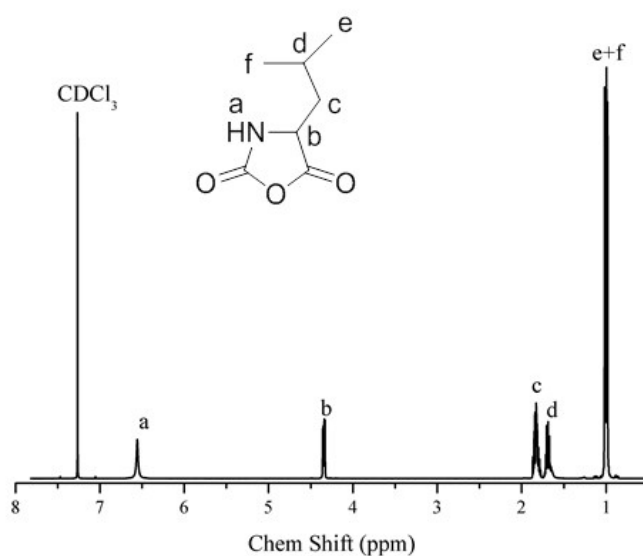

**Figure S1** <sup>1</sup>H NMR spectra of Leu-NCA in DMSO-*d*<sub>6</sub>.

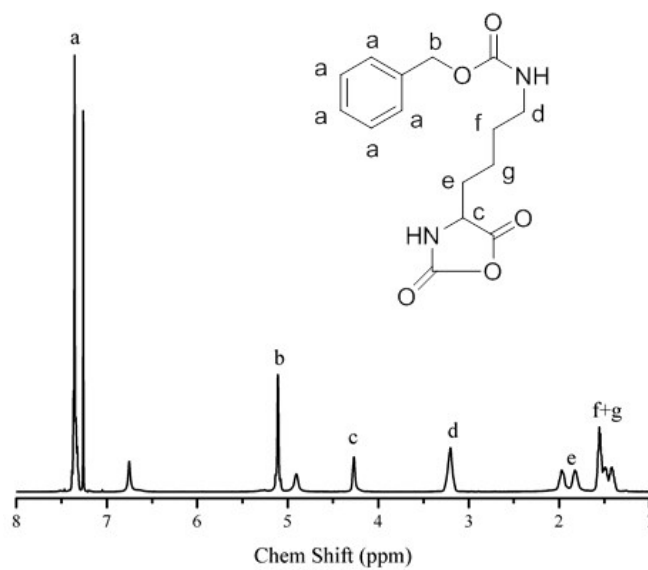

**Figure S2**  $^1\text{H}$  NMR spectra of Lys-NCA in  $\text{DMSO-}d_6$ .

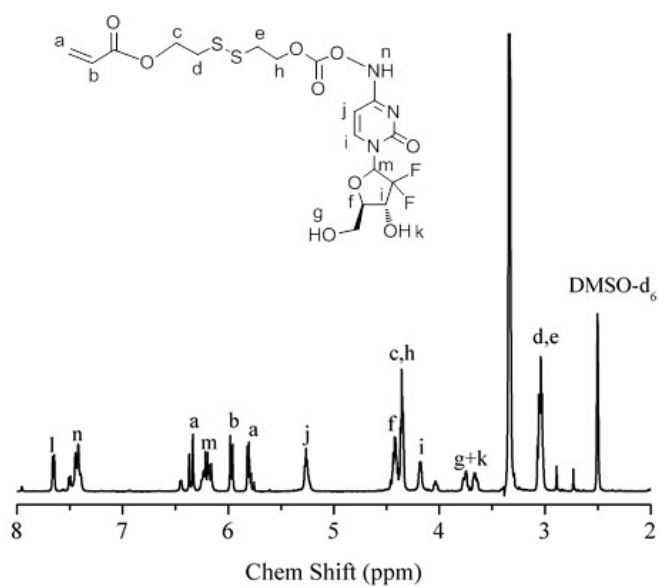

**Figure S3**  $^1\text{H}$  NMR spectra of HSEA-GEM in  $\text{DMSO-}d_6$ .

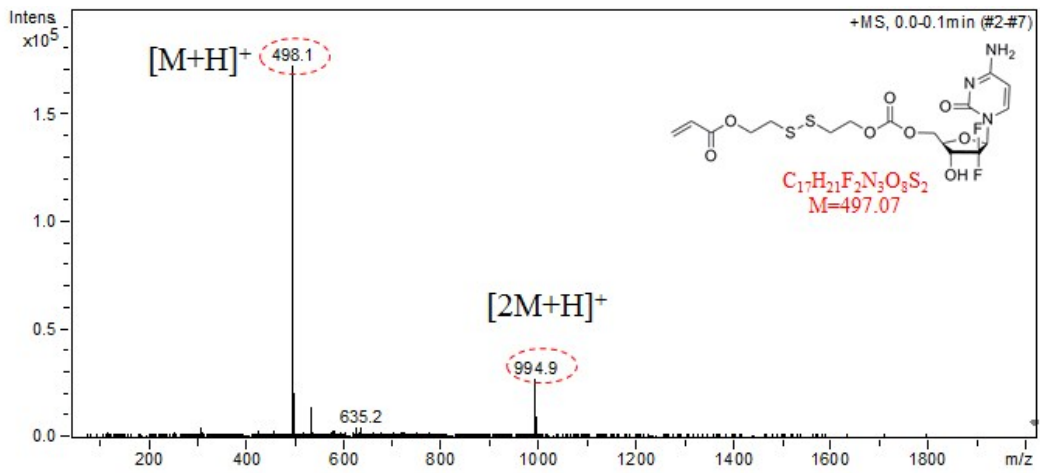

Figure S4 Mass spectrum of HSEA-GEM.

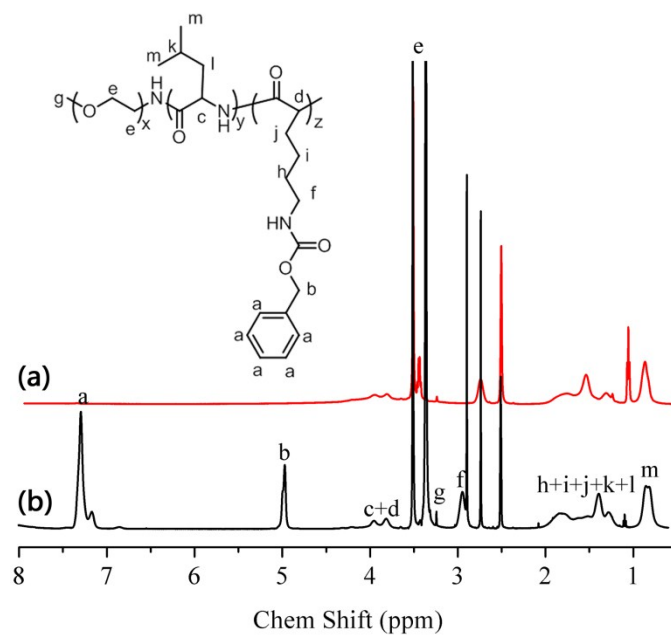

Figure S5 <sup>1</sup>H NMR spectra of mPEG-b-P(Lys-co-Leu) (a) and mPEG-b-P(Lys(Z)-co-Leu) (b).

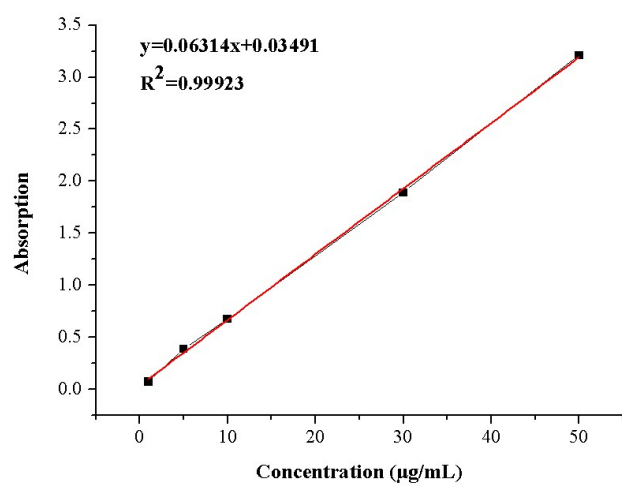

**Figure S6** UV-absorption standard curve of Rho B.
